# Supplementary material for: Chromosome replication and segregation govern the biogenesis and inheritance of inorganic polyphosphate granules
Source: PubMed Central journal article supplement — Mol Biol Cell. 2013 Oct 15;24(20):3177–86. doi: 10.1091/mbc.E13-04-0182 (PMC3806658; doi:10.1091/mbc.e13-04-0182), 2013-10-15

# Supplemental Materials

*Molecular Biology of the Cell*

Henry et al.

## Supplementary Table and Figures

**Table S1. Strains and Plasmids**

| Strain or plasmid | Genotype or Description                                                                           | Reference(s) or source |
|-------------------|---------------------------------------------------------------------------------------------------|------------------------|
| Strain (FC #)     |                                                                                                   |                        |
| 2051              | <i>Escherichia coli</i> K12                                                                       | (1)                    |
| 2053              | K12 $\Delta ppk1$                                                                                 | (1)                    |
| 2055              | K12 $\Delta ppk1$ pSRK-venus                                                                      | This work              |
| 2054              | K12 $\Delta ppk1$ pSRK-venus-ppk1 ( <i>E. coli</i> $\Delta ppk1$ venus-ppk1 <sup>++</sup> )       | This work              |
| 2106              | K12 $\Delta ppk1$ pBAD24-mCherry-ppk1(H434A) pSRK-venus-ppk1(CC)                                  | This work              |
| 2107              | K12 $\Delta ppk1$ pBAD24-mCherry-ppk1(H434A) pSRK-venus-ppk1(EC)                                  | This work              |
| 82                | <i>Asticcacaulis biprosthecum</i>                                                                 | Yves Brun              |
| 163               | <i>Rhodobacter capsulatus</i>                                                                     | Carl Bauer             |
| 20                | <i>Caulobacter crescentus</i> NA1000                                                              | (3, 6)                 |
| 1460              | NA1000 $\Delta ppk1$                                                                              | (2)                    |
| 1454              | NA1000 ppk1(H434A) (formerly annotated H460A)                                                     | (2)                    |
| 1579              | NA1000 xyIX::pMT585 (WT EV)                                                                       | (2)                    |
| 1582              | NA1000 xyIX::pMT585-ppk1 (WT ppk1 <sup>++</sup> )                                                 | (2)                    |
| 1581              | $\Delta ppk1$ xyIX::pMT585 ( $\Delta ppk1$ EV)                                                    | (2)                    |
| 1584              | $\Delta ppk1$ xyIX::pMT585-ppk1 ( $\Delta ppk1$ ppk1 <sup>++</sup> )                              | (2)                    |
| 2039              | NA1000 venus-ppk1                                                                                 | This work              |
| 2050              | NA1000 venus-ppk1(H434A)                                                                          | This work              |
| 2037              | $\Delta ppk1$ xyIX::pMT854-ppk1 ( $\Delta ppk1$ venus-ppk1 <sup>++</sup> )                        | This work              |
| 2059              | NA1000 xyIX::MT854-ppk1(H434A) (venus-ppk1(H434A) <sup>++</sup> )                                 | This work              |
| 2035              | $\Delta ppk1$ xyIX::pMT854 ( $\Delta ppk1$ EV)                                                    | This work              |
| 2060              | $\Delta ppk1$ xyIX::pMT854-ppk1(H434A) ( $\Delta ppk1$ venus-ppk1(H434A) <sup>++</sup> )          | This work              |
| 2062              | NA1000 xyIX::pMT854-ppk1(1-696) (venus-ppk1( $\Delta$ CT16) <sup>++</sup> )                       | This work              |
| 2063              | $\Delta ppk1$ xyIX::pMT854-ppk1(1-696) ( $\Delta ppk1$ venus-ppk1( $\Delta$ CT16) <sup>++</sup> ) | This work              |
| 2065              | $\Delta ppk1$ xyIX::pMT854-ppk1(109-712) ( $\Delta ppk1$ venus-ppk1( $\Delta$ N) <sup>++</sup> )  | This work              |
| 2067              | $\Delta ppk1$ xyIX::pMT854-ppk1(313-712) ( $\Delta ppk1$ venus-ppk1( $\Delta$ NH) <sup>++</sup> ) | This work              |
| 2069              | $\Delta ppk1$ xyIX::pMT854-ppk1(1-317) ( $\Delta ppk1$ venus-ppk1( $\Delta$ C1C2) <sup>++</sup> ) | This work              |
| 2071              | $\Delta ppk1$ xyIX::pMT854-ppk1(1-500) ( $\Delta ppk1$ venus-ppk1( $\Delta$ C2) <sup>++</sup> )   | This work              |

|          |                                                                                             |              |
|----------|---------------------------------------------------------------------------------------------|--------------|
| 1103     | NA1000 <i>dnaC303(ts) (holB(ts))</i>                                                        | (7)          |
| 2046     | NA1000 <i>xyIX::pMT590-parA (parA-mCherry<sup>++</sup>)</i>                                 | This work    |
| 2047     | NA1000 <i>xyIX::pMT590-parA(K20R) (parA(K20R)-mCherry<sup>++</sup>)</i>                     | This work    |
| 791      | NA1000 <i>egfp-parB</i>                                                                     | (9)          |
| 2048     | NA1000 <i>egfp-parB xyIX::pMT590-parA</i>                                                   | This work    |
| 2049     | NA1000 <i>egfp-parB xyIX::pMT590-parA(K20R)</i>                                             | This work    |
| 2057     | $\Delta ppk1$ <i>xyIX::pMT697-ppk1 (<math>\Delta ppk1</math> mCherry-ppk1<sup>++</sup>)</i> | This work    |
| 2105     | $\Delta ppk1$ pMT854-ppk1(EC) ( $\Delta ppk1$ venus-ppk1(EC) <sup>++</sup> )                | This work    |
| Plasmids |                                                                                             |              |
| pNPTS138 | <i>sacB</i> counterselectable, for making allelic replacements                              | Dickon Alley |
| pSRK-Kn  | IPTG-inducible expression                                                                   | (5)          |
| pMT585   | xylose-inducible expression                                                                 | (8)          |
| pMT590   | xylose-inducible expression of C-terminal mCherry fusion                                    | (8)          |
| pMT697   | xylose-inducible expression of N-terminal mCherry fusion                                    | (8)          |
| pMT854   | xylose-inducible expression of N-terminal Venus fusion                                      | (8)          |
| pBAD24   | arabinose-inducible expression                                                              | (4)          |

### **Supplementary Figure Legends**

**Supplemental Movie 1.** Time-lapse microscopy of *venus-ppk1* cells on nutrient agarose pads. Micrographs of increasing exposure times were taken every 30 seconds for ten minutes.

**Figure S1. Representative images of *venus-ppk1* truncations.** A) Schematic representing the boundary residues of the truncated alleles used in this work. B) Representative micrographs from truncated alleles of *ppk1*. Each of the Venus and DAPI (polyP) images were captured with the same exposure and camera settings and scaled equally for comparison. In the merged image, Venus is depicted in the red channel, DAPI (polyP) is depicted in the green channel.

**Figure S2. *mCherry-ppk1* representative micrographs and *E. coli* controls.** A) Representative micrographs of  $\Delta ppk1$  *mCherry-ppk1* grown in M2G. *mCherry*-fluorescent foci were present and granule production was complemented without the addition of xylose. Induction with xylose significantly increased background fluorescence, so we relied on leaky expression from the xylose promoter, which was sufficient to drive production of DAPI-staining granules. In the merged image, *mCherry* is depicted in the red channel, DAPI (polyP) is depicted in the green channel. B) DAPI-stained *E. coli* K12 or K12  $\Delta ppk1$  expressing *venus* alone, demonstrating that neither strain produces DAPI-fluorescent granules, and that *venus* alone does not give fluorescent foci. In the merged image, Venus is depicted in the red channel, DAPI (polyP) is depicted in the green channel. C) *E. coli* K12  $\Delta ppk1$  expressing *mCherry-ppk1(H434A)* (from *C. crescentus*) and either *venus-ppk1(CC)* (from *C. crescentus*) or *venus-ppk1(EC)* (from *E. coli*). *mCherry* is depicted in the red channel, Venus is

depicted in the green channel. D) DAPI-stained *C. crescentus*  $\Delta ppk1$  expressing *venus-ppk1(EC)*. Induction with xylose was necessary for granule production. Venus is depicted in the red channel, DAPI (polyP) is depicted in the green channel.

**Figure S3. Representative micrographs depicting effects of *parA(K20R)* expression on ParB and polyP granule localization.** A) Representative micrographs of *gfp-parB* expressing *parA-* or *parA(K20R)-mCherry*, confirming that *parA(K20R)-mCherry* expression blocks segregation of *parB* foci, a marker of chromosome origins. In the merged image, mCherry is depicted in the red channel, GFP is depicted in the green channel. B) Example micrographs from Figure 5D, showing impaired granule synthesis and abnormal positioning following *parA(K20R)-mCherry* expression. In the merged image, mCherry is depicted in the red channel, DAPI (polyP) is depicted in the green channel. C) Representative micrographs of *venus-ppk1* expressing *parA-* or *parA(K20R)-mCherry*, demonstrating the co-localization of Venus-Ppk1 with polyP granules under both conditions. In the merged image, Venus is depicted in the red channel, DAPI (polyP) is depicted in the green channel.

### Literature Cited

1. **Baba, T., T. Ara, M. Hasegawa, Y. Takai, Y. Okumura, M. Baba, K. A. Datsenko, M. Tomita, B. L. Wanner, and H. Mori.** 2006. Construction of Escherichia coli K-12 in-frame, single-gene knockout mutants: the Keio collection. *Mol. Syst. Biol.* **2**:2006.0008.
2. **Boutte, C. C., J. T. Henry, and S. Crosson.** 2012. ppGpp and polyphosphate modulate cell cycle progression in *Caulobacter crescentus*. *J Bacteriol* **194**:28-35.
3. **Evinger, M., and N. Agabian.** 1977. Envelope-associated nucleoid from *Caulobacter crescentus* stalked and swarmer cells. *J. Bacteriol.* **132**:294-301.
4. **Guzman, L. M., D. Belin, M. J. Carson, and J. Beckwith.** 1995. Tight regulation, modulation, and high-level expression by vectors containing the arabinose PBAD promoter. *J Bacteriol* **177**:4121-4130.
5. **Khan, S. R., J. Gaines, R. M. Roop, and S. K. Farrand.** 2008. Broad-host-range expression vectors with tightly regulated promoters and their use to examine the influence of TraR and TraM expression on Ti plasmid quorum sensing. *Appl. Environ. Microbiol.* **74**:5053-5062.
6. **Marks, M. E., C. M. Castro-Rojas, C. Teiling, L. Du, V. Kapatral, T. L. Walunas, and S. Crosson.** 2010. The genetic basis of laboratory adaptation in *Caulobacter crescentus*. *J. Bacteriol.* **192**:3678-3688.
7. **Osley, M. A., and A. Newton.** 1977. Mutational analysis of developmental control in *Caulobacter crescentus*. *Proc Natl Acad Sci U S A* **74**:124-128.
8. **Thanbichler, M., A. A. Iniesta, and L. Shapiro.** 2007. A comprehensive set of plasmids for vanillate- and xylose-inducible gene expression in *Caulobacter crescentus*. *Nucleic Acids Res.* **35**:e137.
9. **Thanbichler, M., and L. Shapiro.** 2006. MipZ, a spatial regulator coordinating chromosome segregation with cell division in *Caulobacter*. *Cell* **126**:147-162.

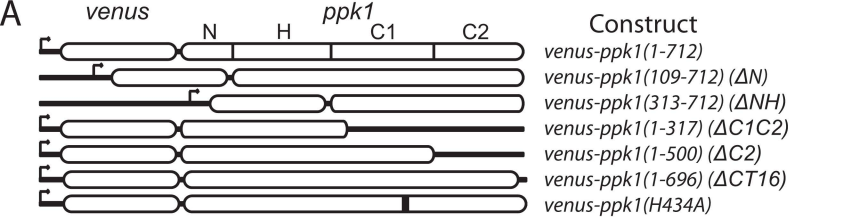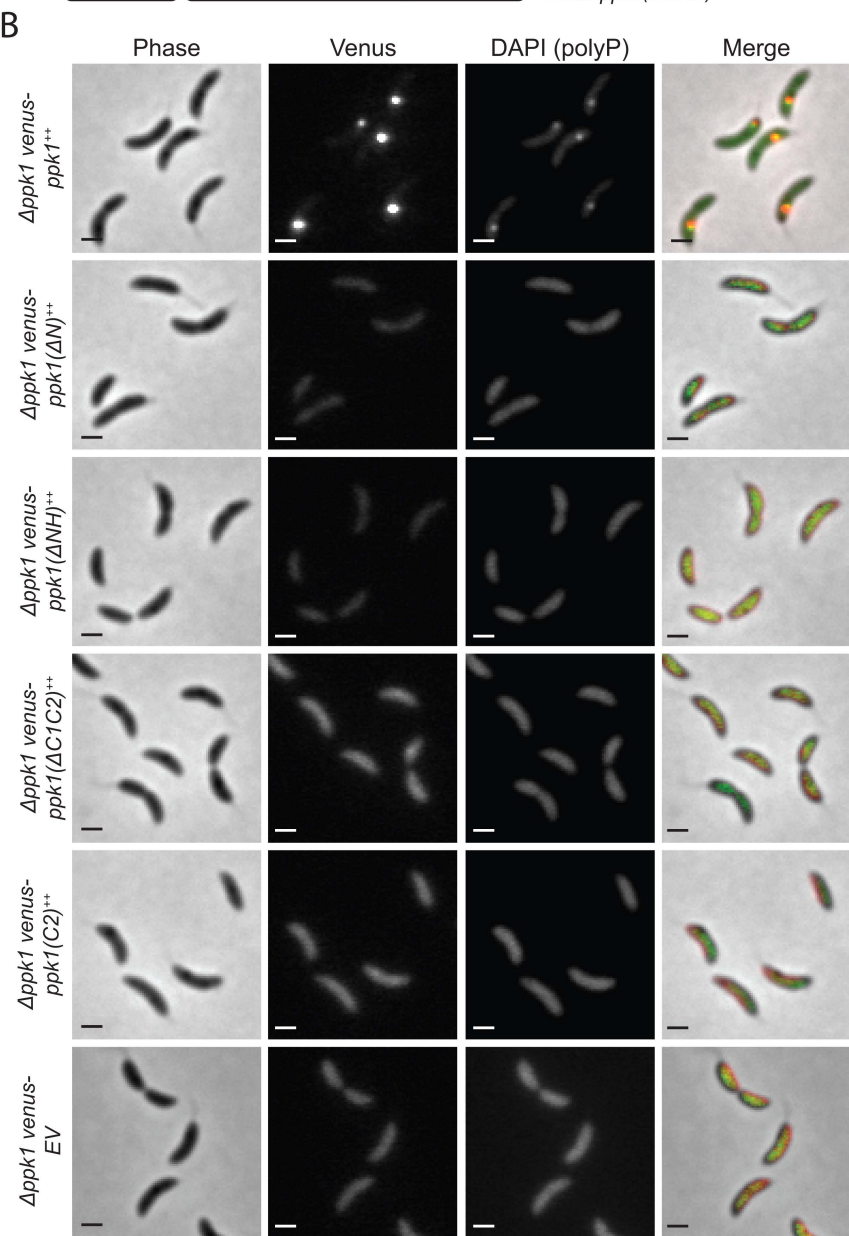

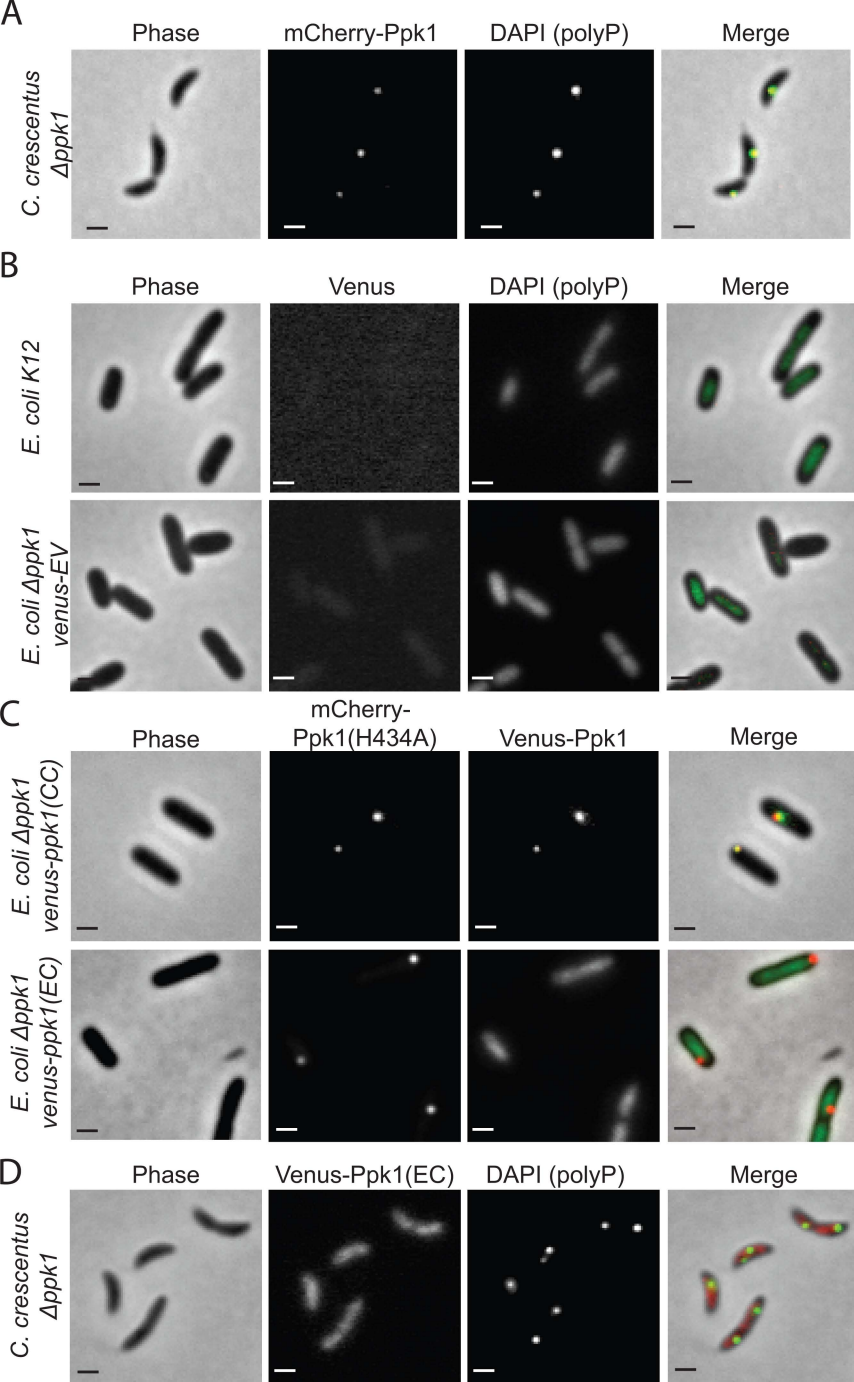

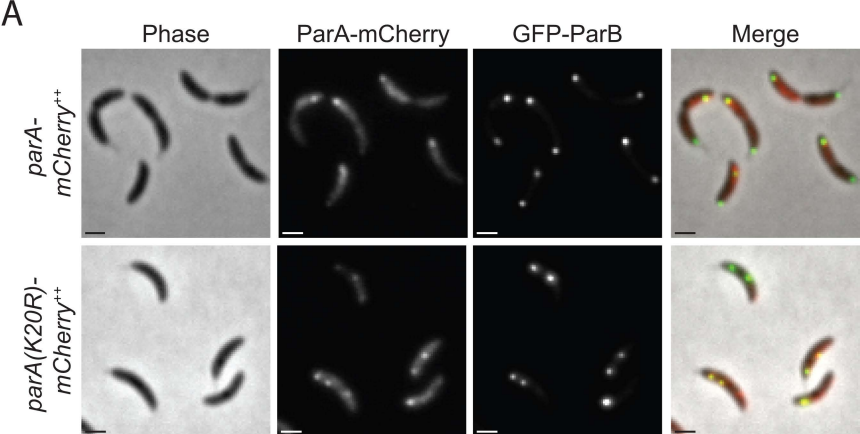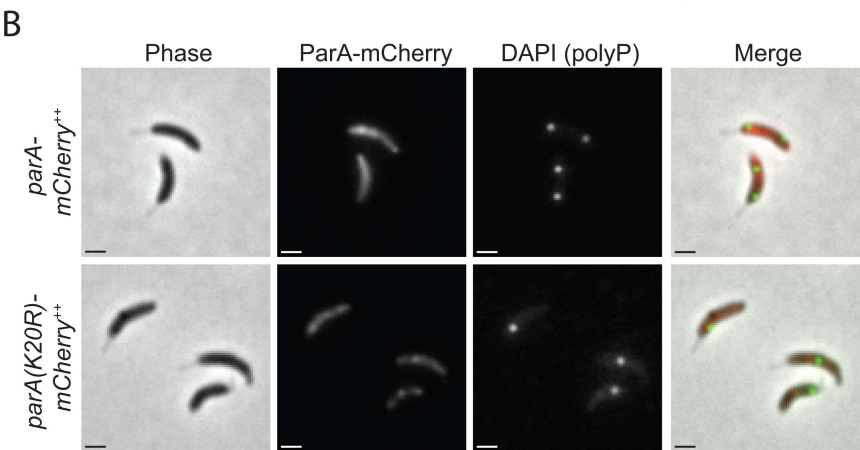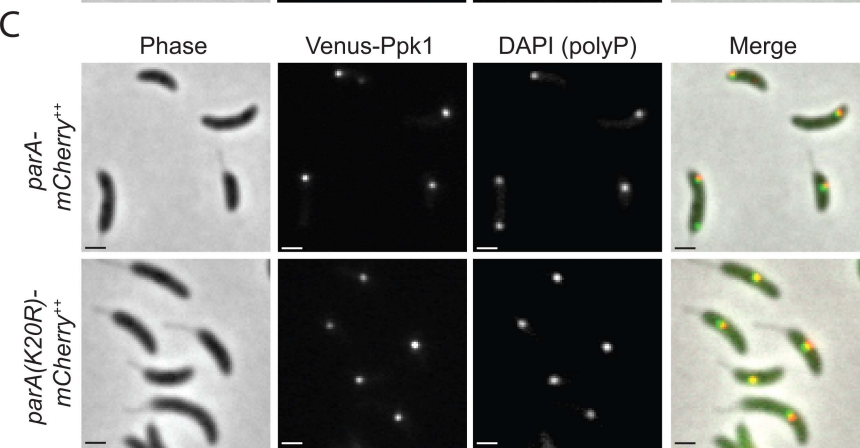

Supplement: supp_E13-04-0182v1_CombinedSupMats.pdf [file supp_E13-04-0182v1_CombinedSupMats.pdf]
